# Supplementary material for: Ligand-Based Drug Design of Genipin Derivatives with Cytotoxic Activity against HeLa Cell Line: A Structural and Theoretical Study
Source: MDPI journal article supplement (doi:10.3390/ph16121647), 2023-11-23
Supplement: s1 [file s1]

## Supplementary data

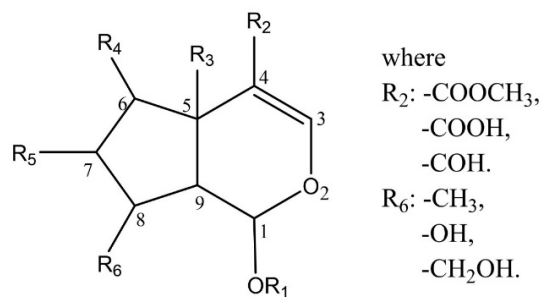

**Figure S1.** Structure of iridoid skeleton. Principal substituents in  $R_2$  and  $R_6$  are specified.

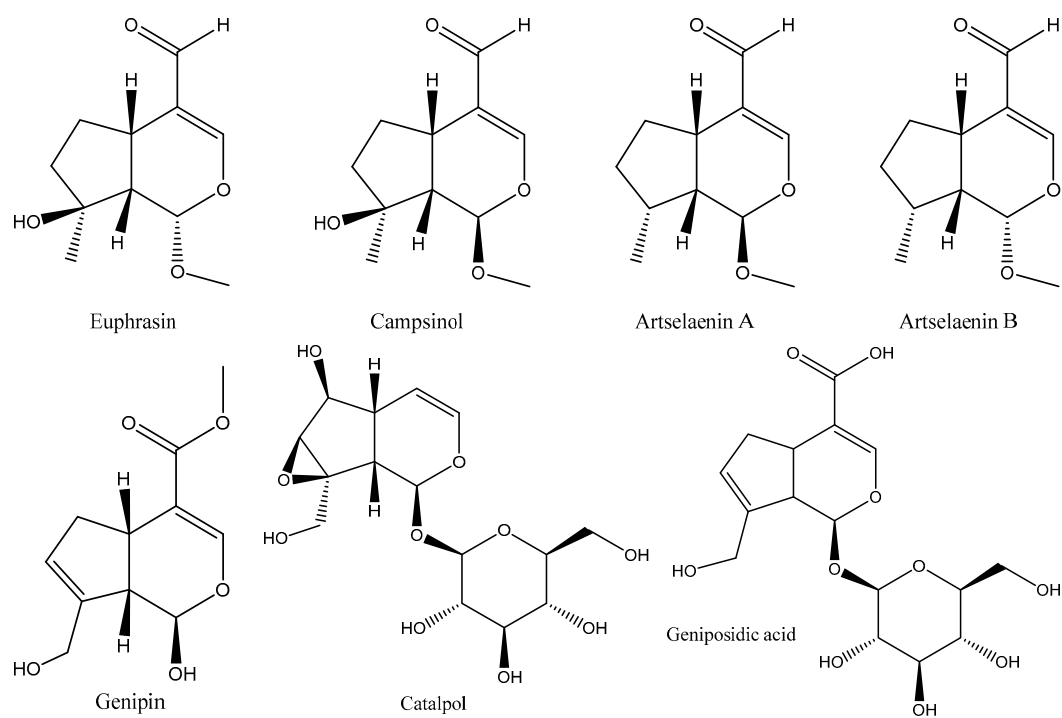

**Figure S2.** *Cont.*

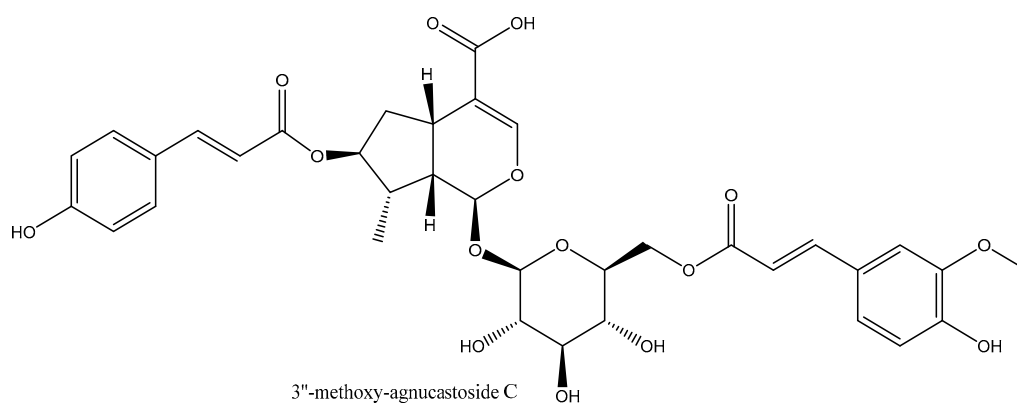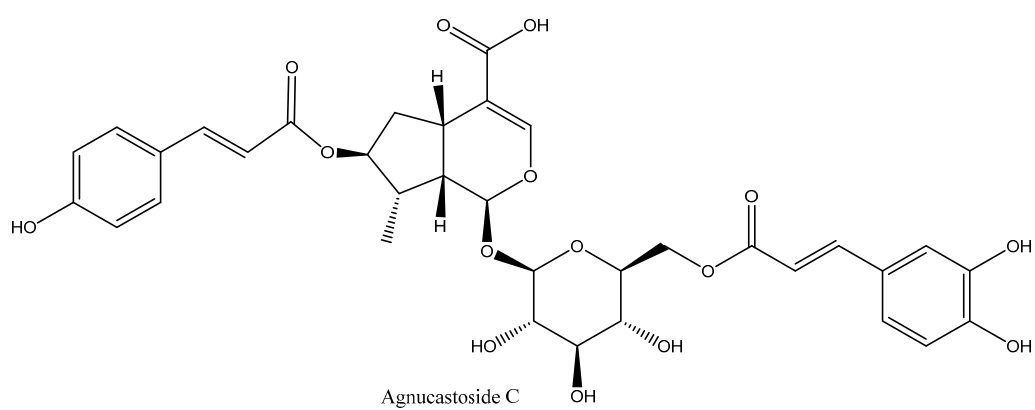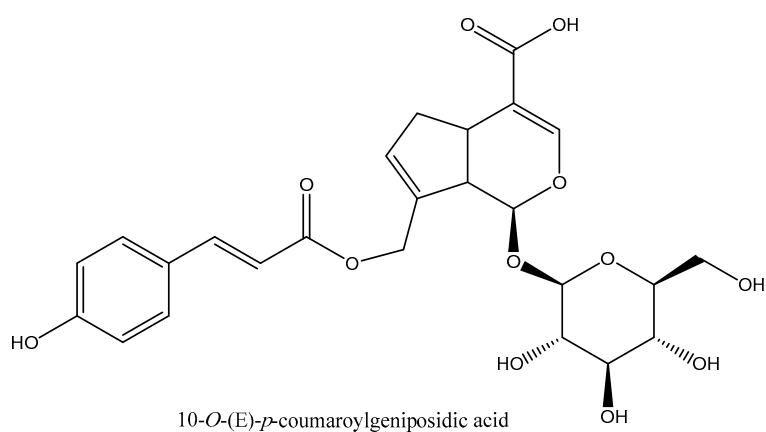

Figure S2. Cont.

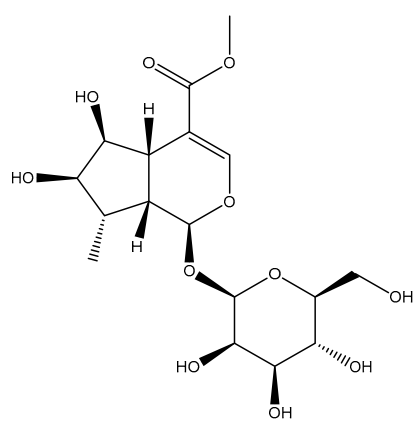

Spinomannoside

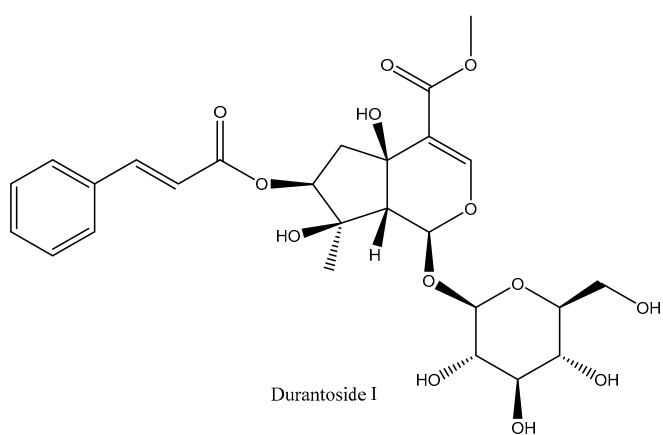

Durantose I

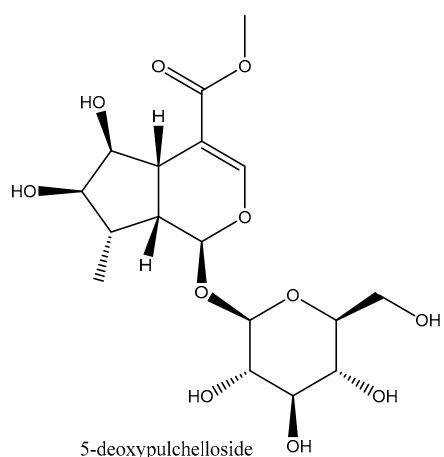

5-deoxypulchelloside

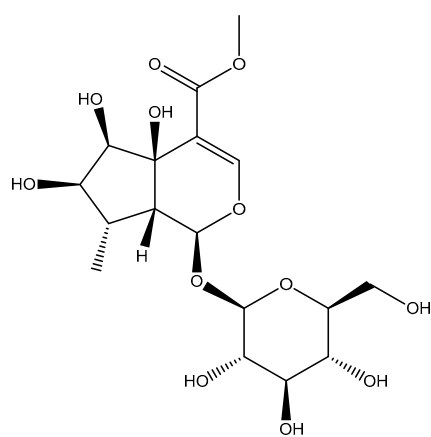

Pulchelloside

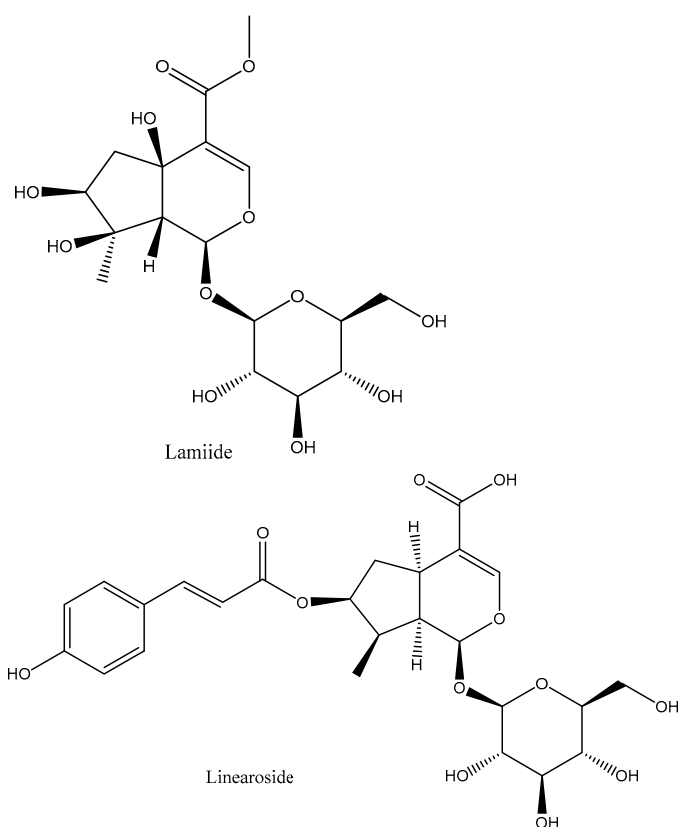

**Figure S2.** *Cont.*

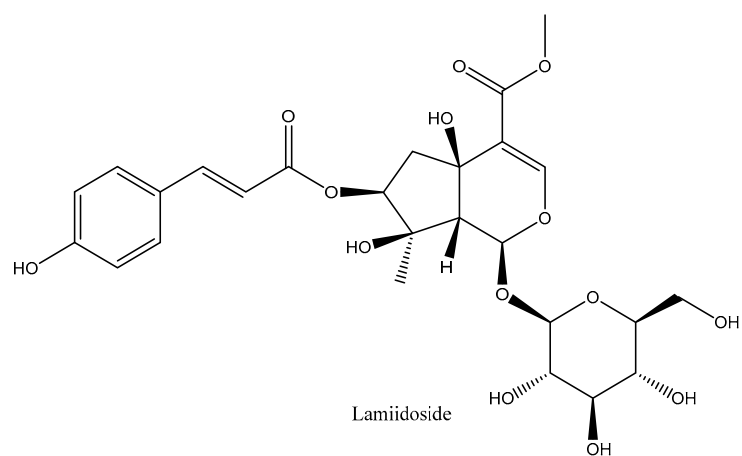

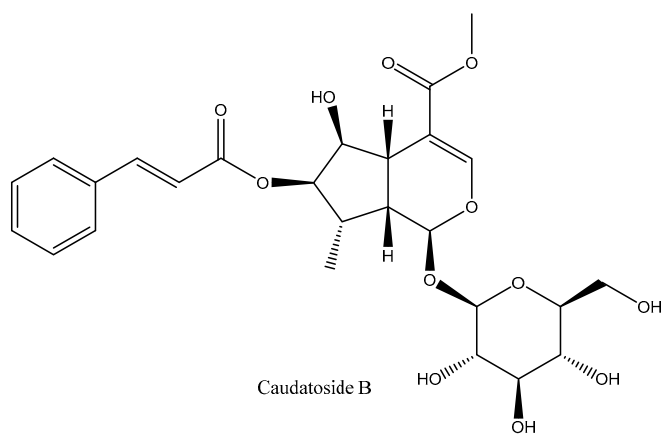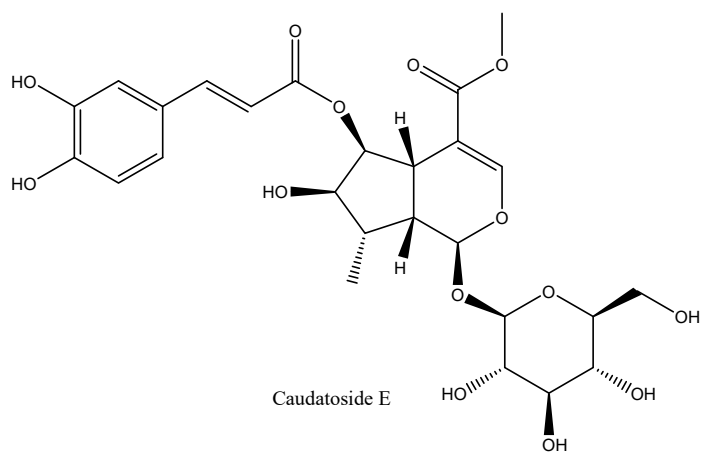

**Figure S2.** *Cont.*

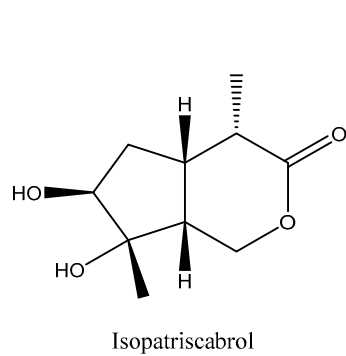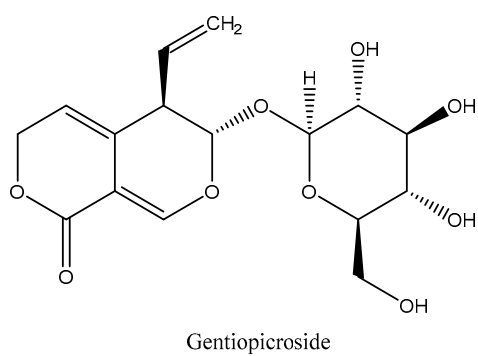

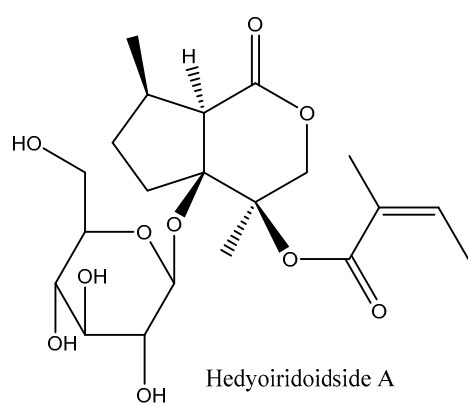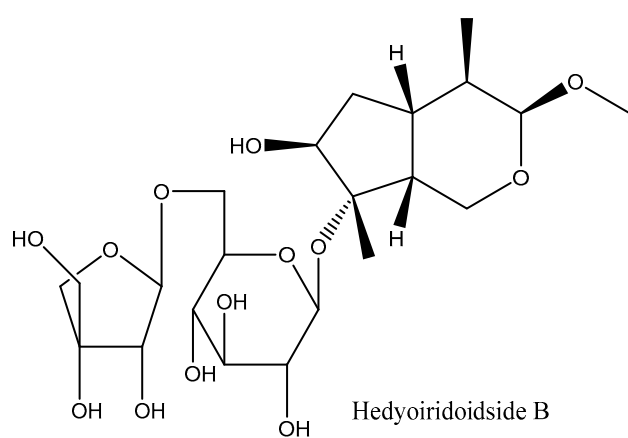

**Figure S2.** *Cont.*

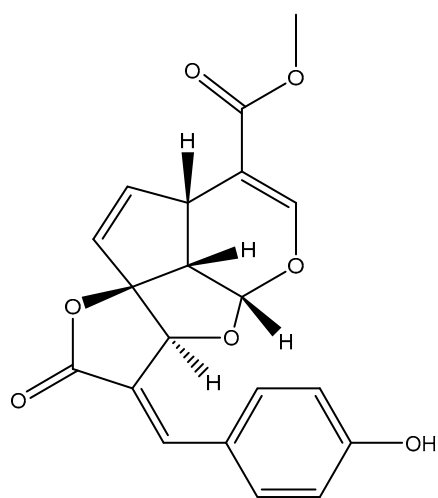

Prismatomerin

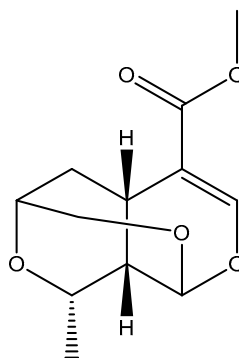

Sarracenin

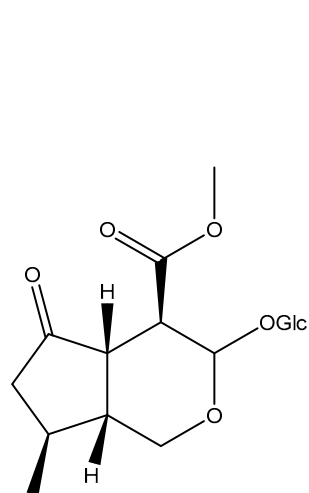

Loniceroside A

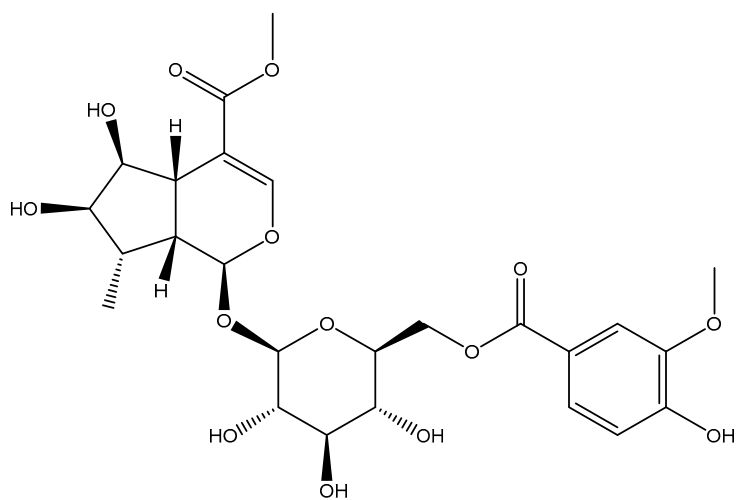

Tunisposin A

Figure S2. *Cont.*

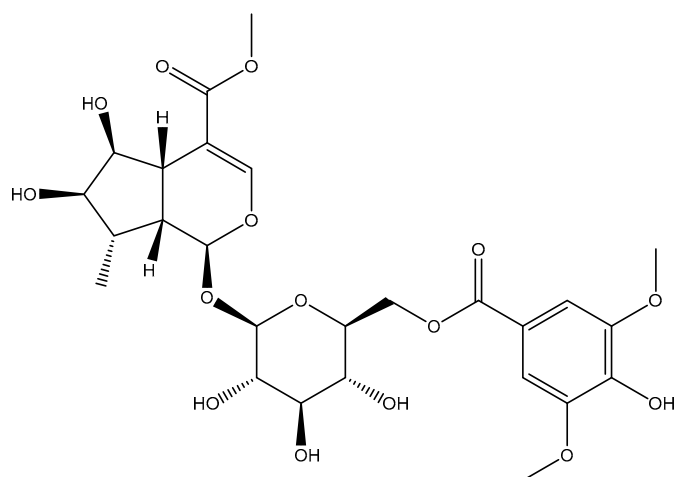

Tunispinoside B

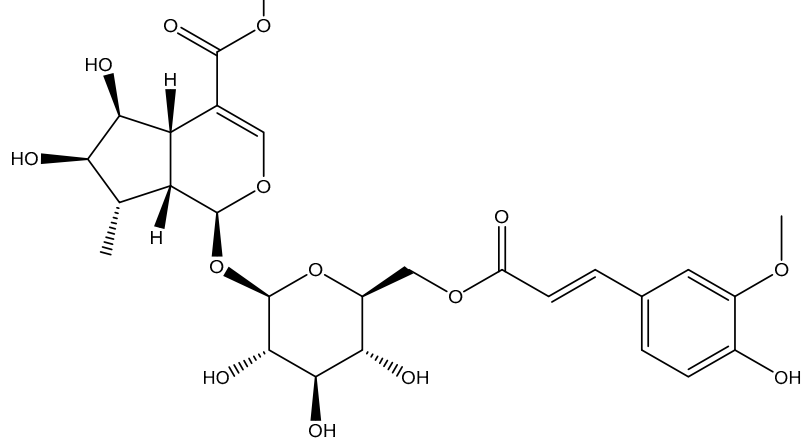

Tunispinoside C

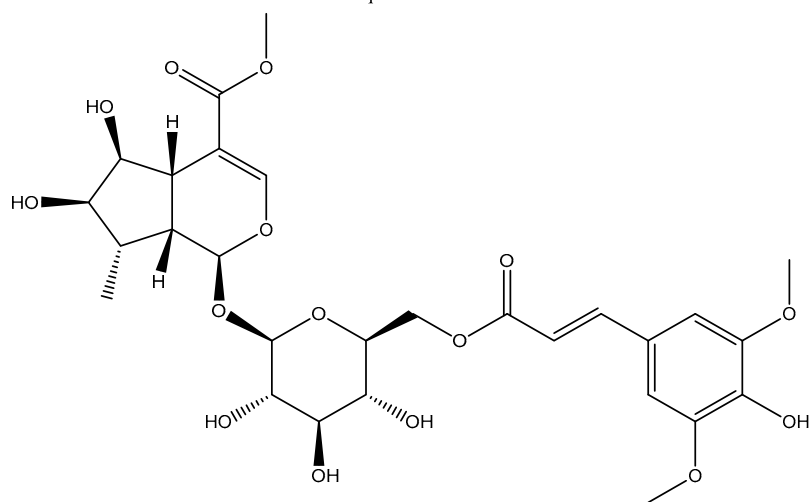

Tunispinoside D

Figure S2. *Cont.*



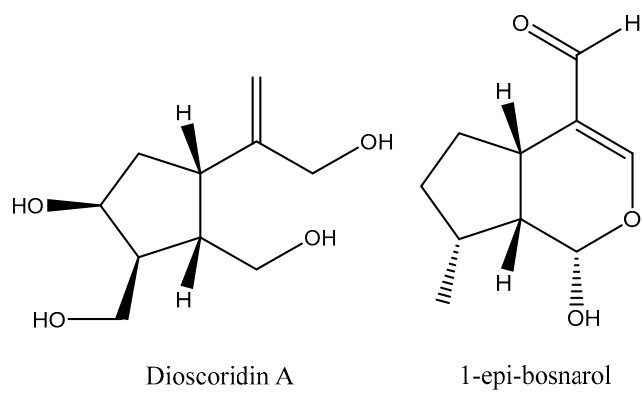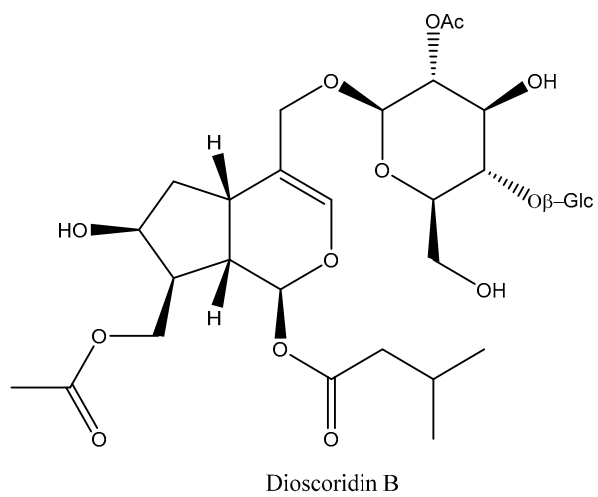

**Figure S2.** *Cont.*

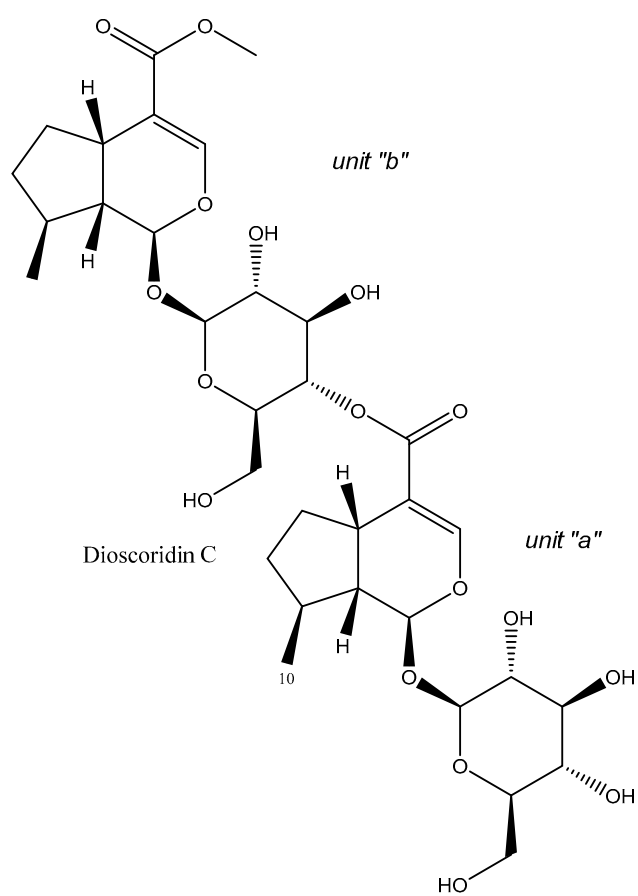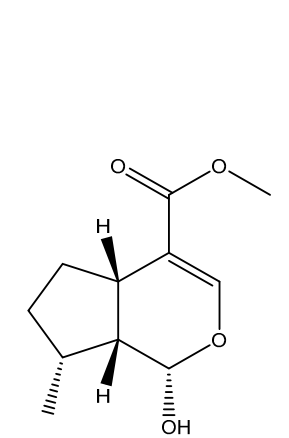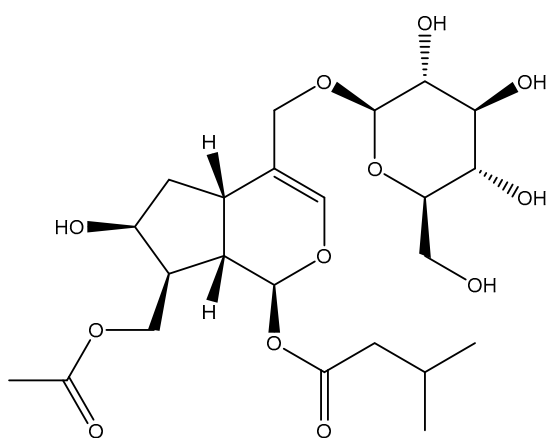

**Figure S2.** *Cont.*

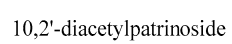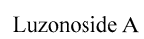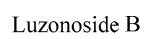

**Figure S2. Cont.**

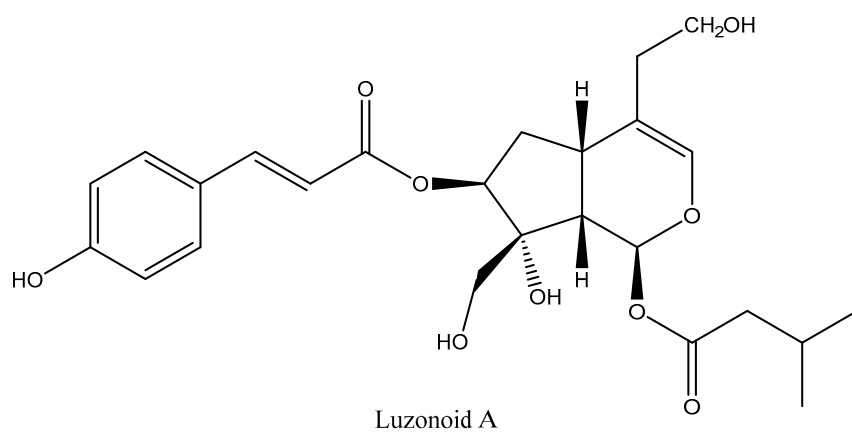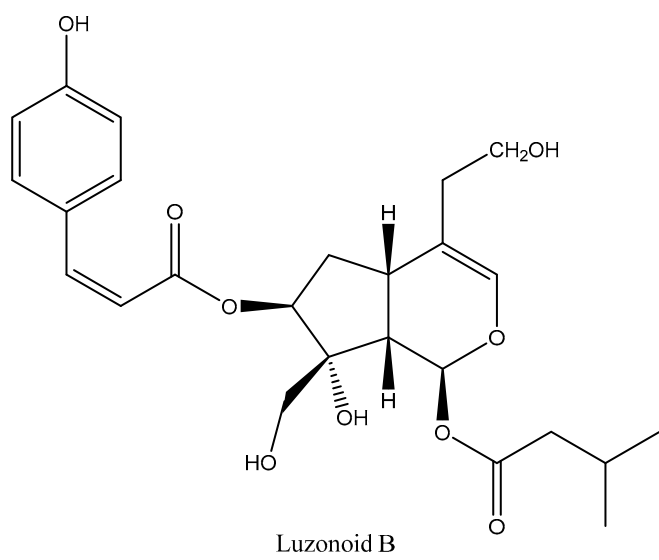

**Figure S2.** *Cont.*

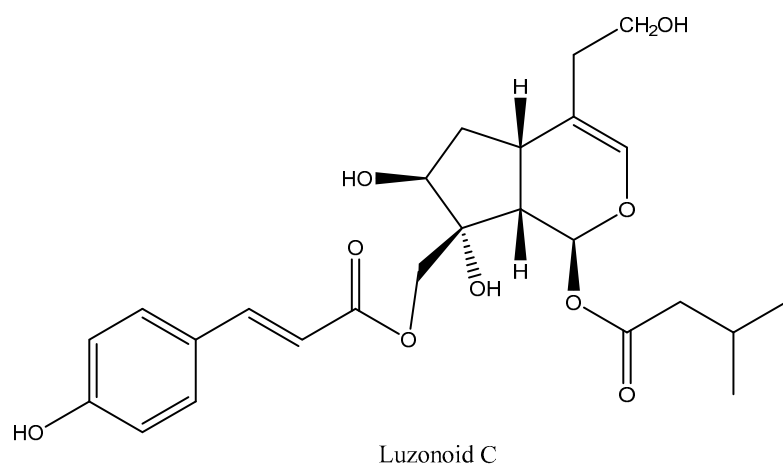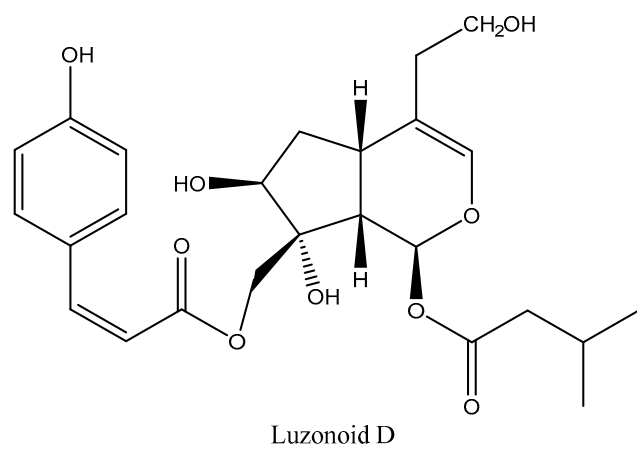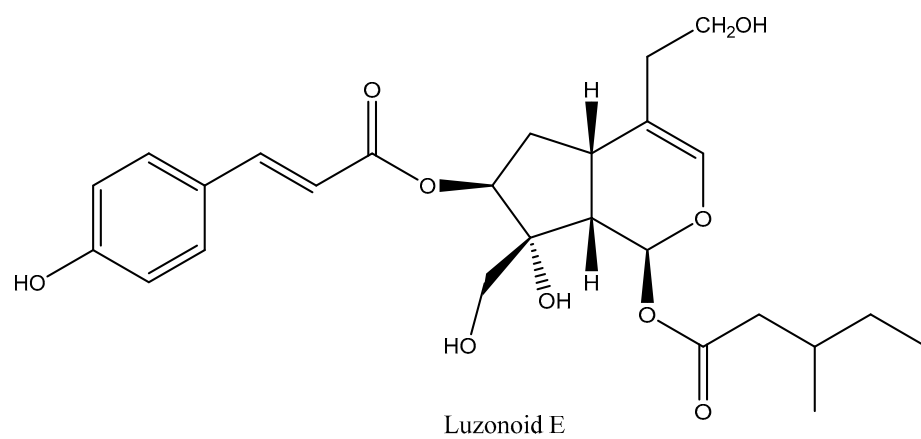

**Figure S2.** 2D structures of iridoids with reported cytotoxic activity against HeLa cell line.

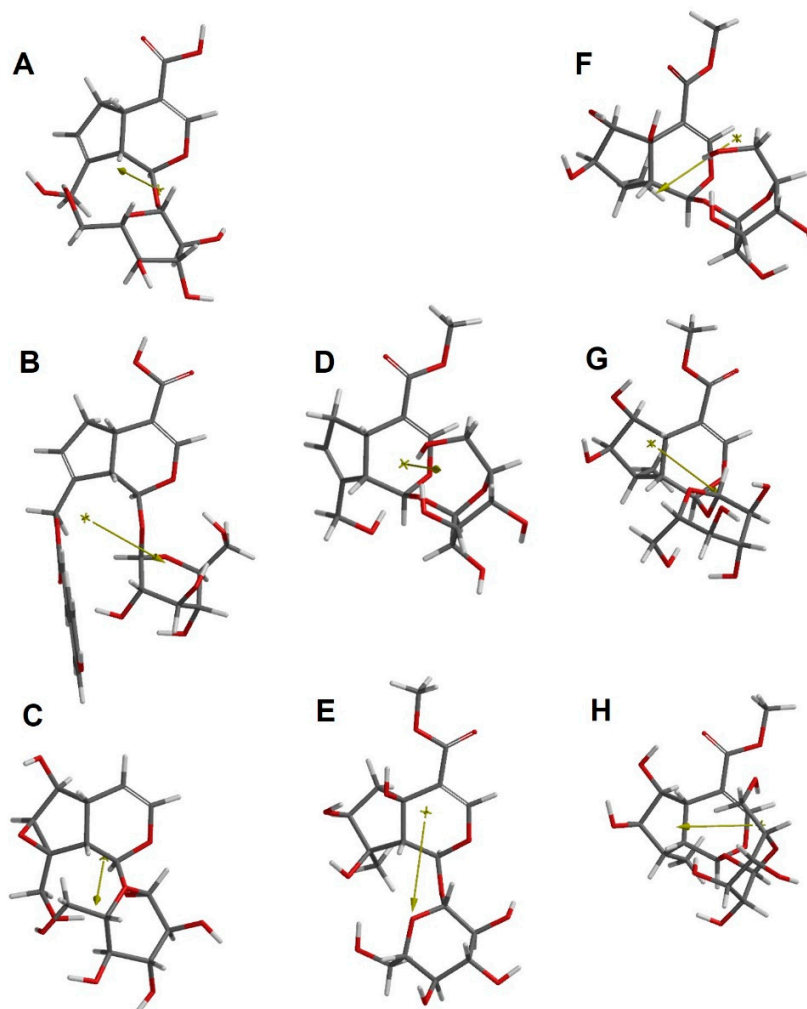

**Figure S3.** 3D structures of iridoids glycosides evaluated against HeLa cell line, including the dipole vector (gold arrow). (A) Geniposidic acid, (B) 10-*O*-(*E*)-*p*-coumaroylgeniposidic acid, (C) Catalpol, (D) Geniposide, (E) Lamiide, (F) Pulchelloside I, (G) 5-deoxypulchelloside I, (H) Spinomannoside.

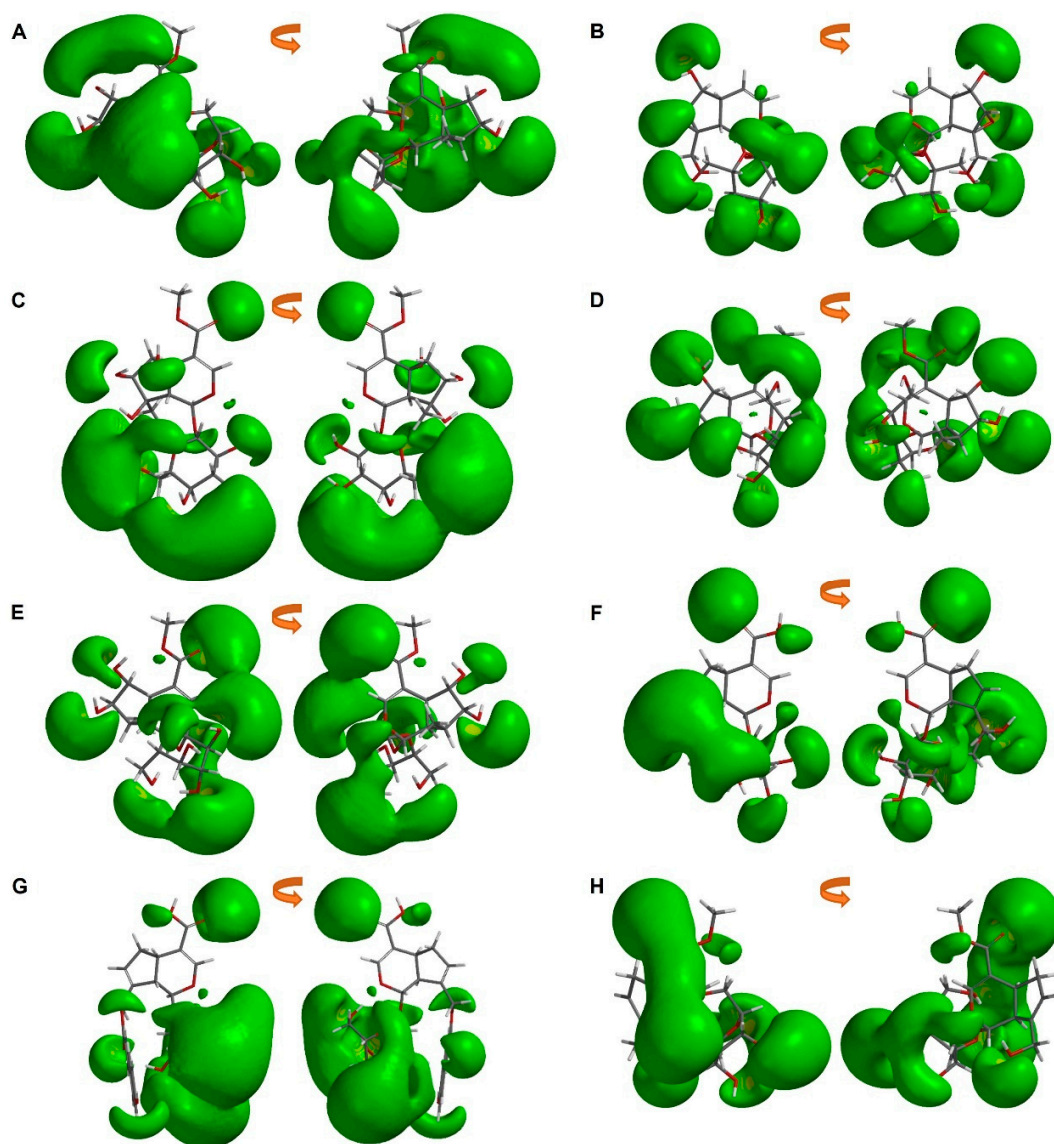

**Figure S4.** Molecular electrostatic potential iso-surface of -10 kcal/mol of iridoids glycosides. (A) Pulchelloside I, (B) Catalpol, (C) Lamiide, (D) Spinomannoside, (E) 5-deoxypulchelloside I, (F) geniposidic acid, (G) 10-*O*-(*E*)-*p*-coumaroylgeniposidic acid, (H) Geniposide.

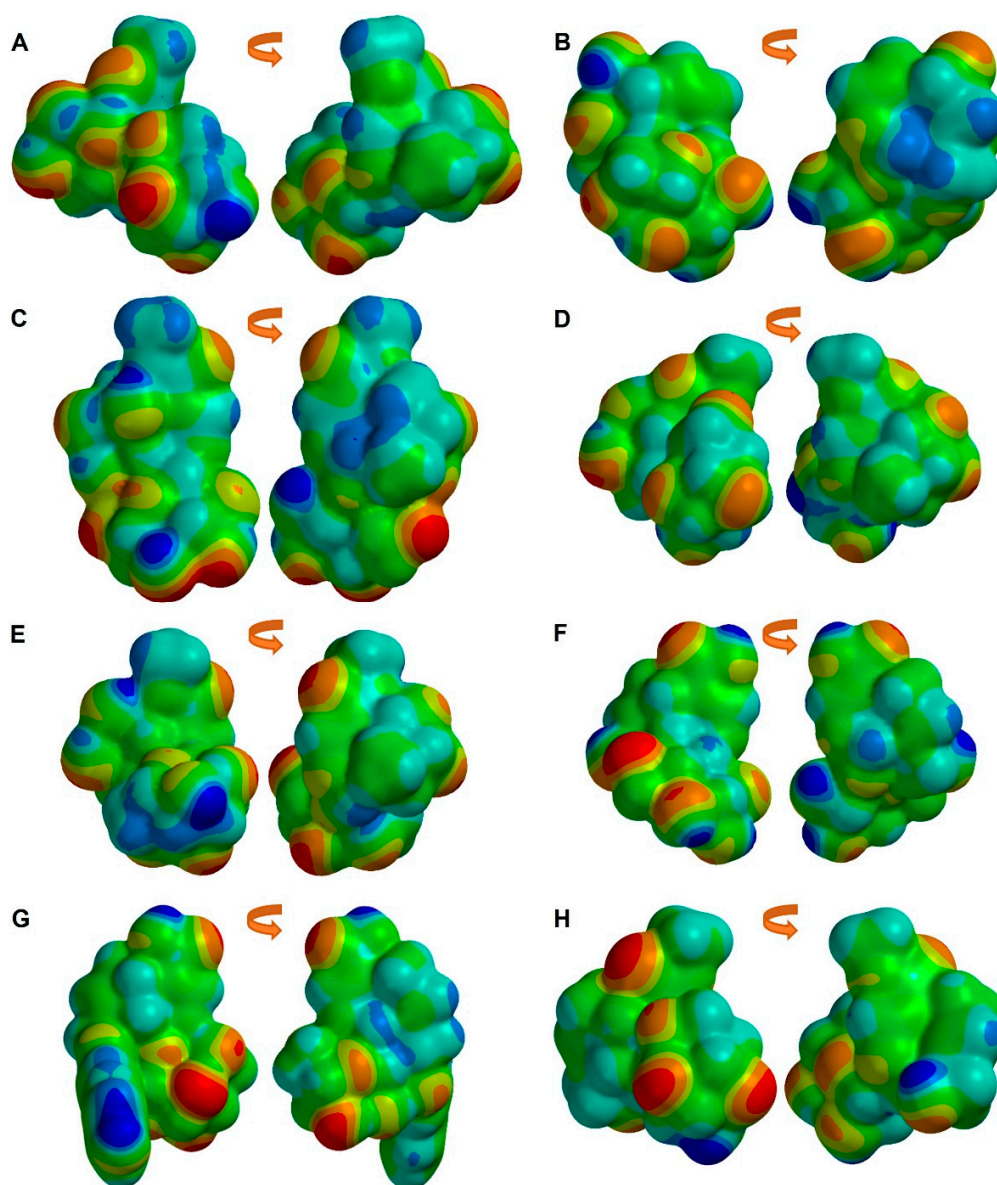

**Figure S5.** Molecular electrostatic potential map of iridoids glycosides. (A) Pulchelloside I, (B) Catalpol, (C) Lamiide, (D) Spinomannoside, (E) 5-deoxypulchelloside I, (F) Geniposidic acid, (G) 10-*O*-(*E*)-*p*-coumaroylgeniposidic acid, (H) Geniposide.



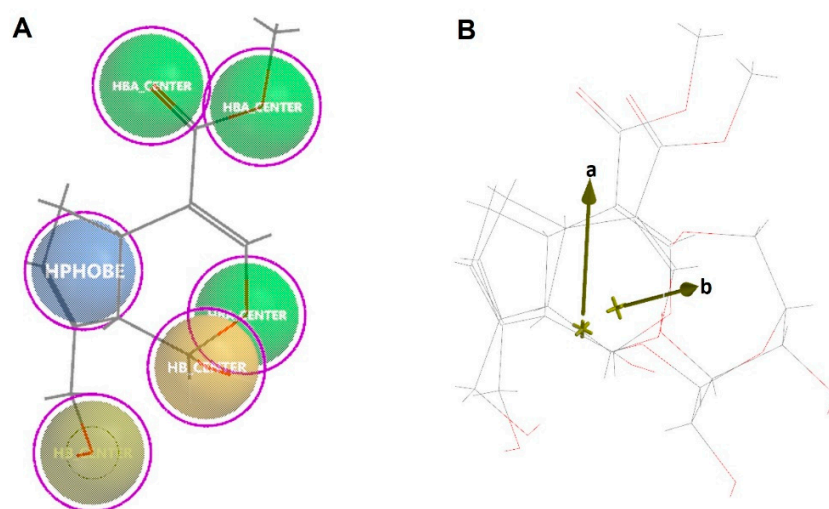

**Figure S6.** Alignment of genipin with geniposide. (A) Common similarity centers by CFDs of genipin (purple circles represent the CFDs selected for the alignment), (B) Dipole vector represented by gold arrows of both iridoids aligned is shown (a: genipin, b: geniposide).

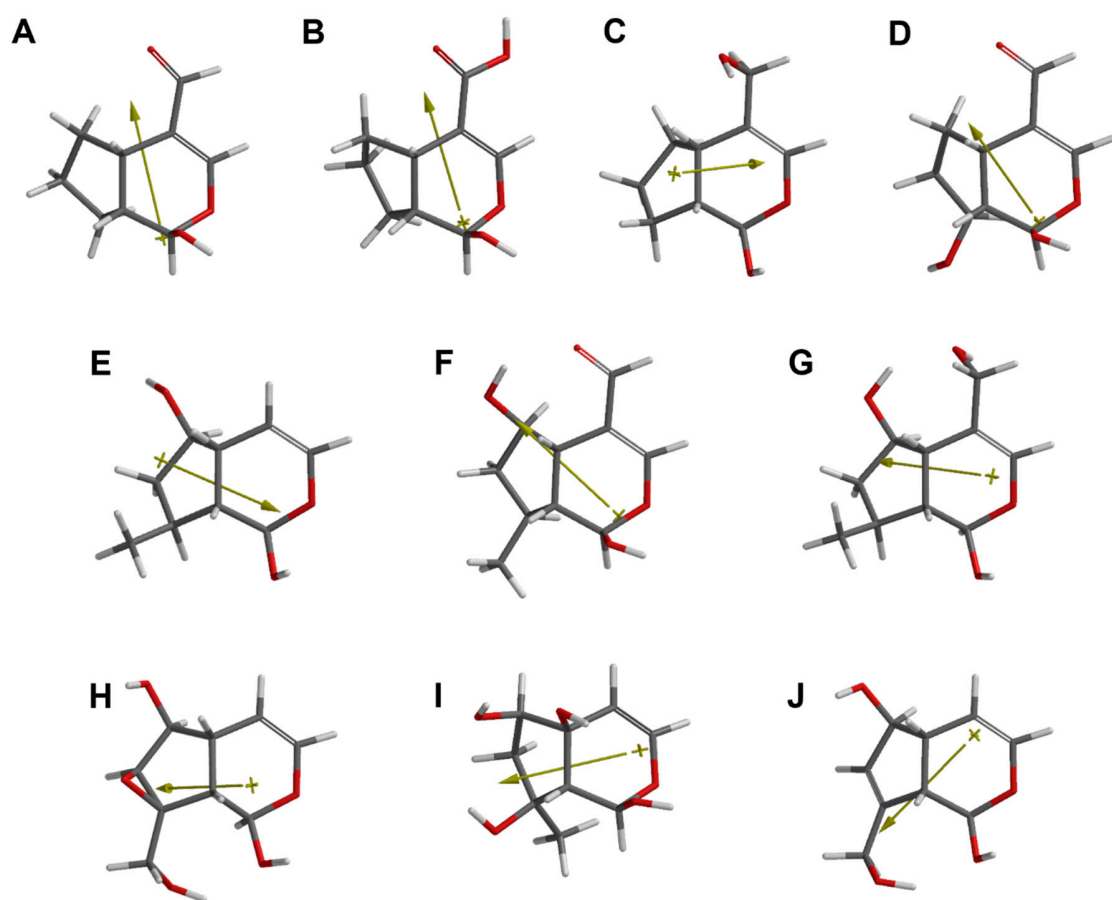

**Figure S7.** 3D structures of the best designed iridoids based on genipin. Gold arrows represent dipole vector in each iridoid. (A) D9, (B) D10, (C) D35, (D) D36, (E) D55, (F) D56, (G) D58, (H) D60, (I) D61, (J) D62.

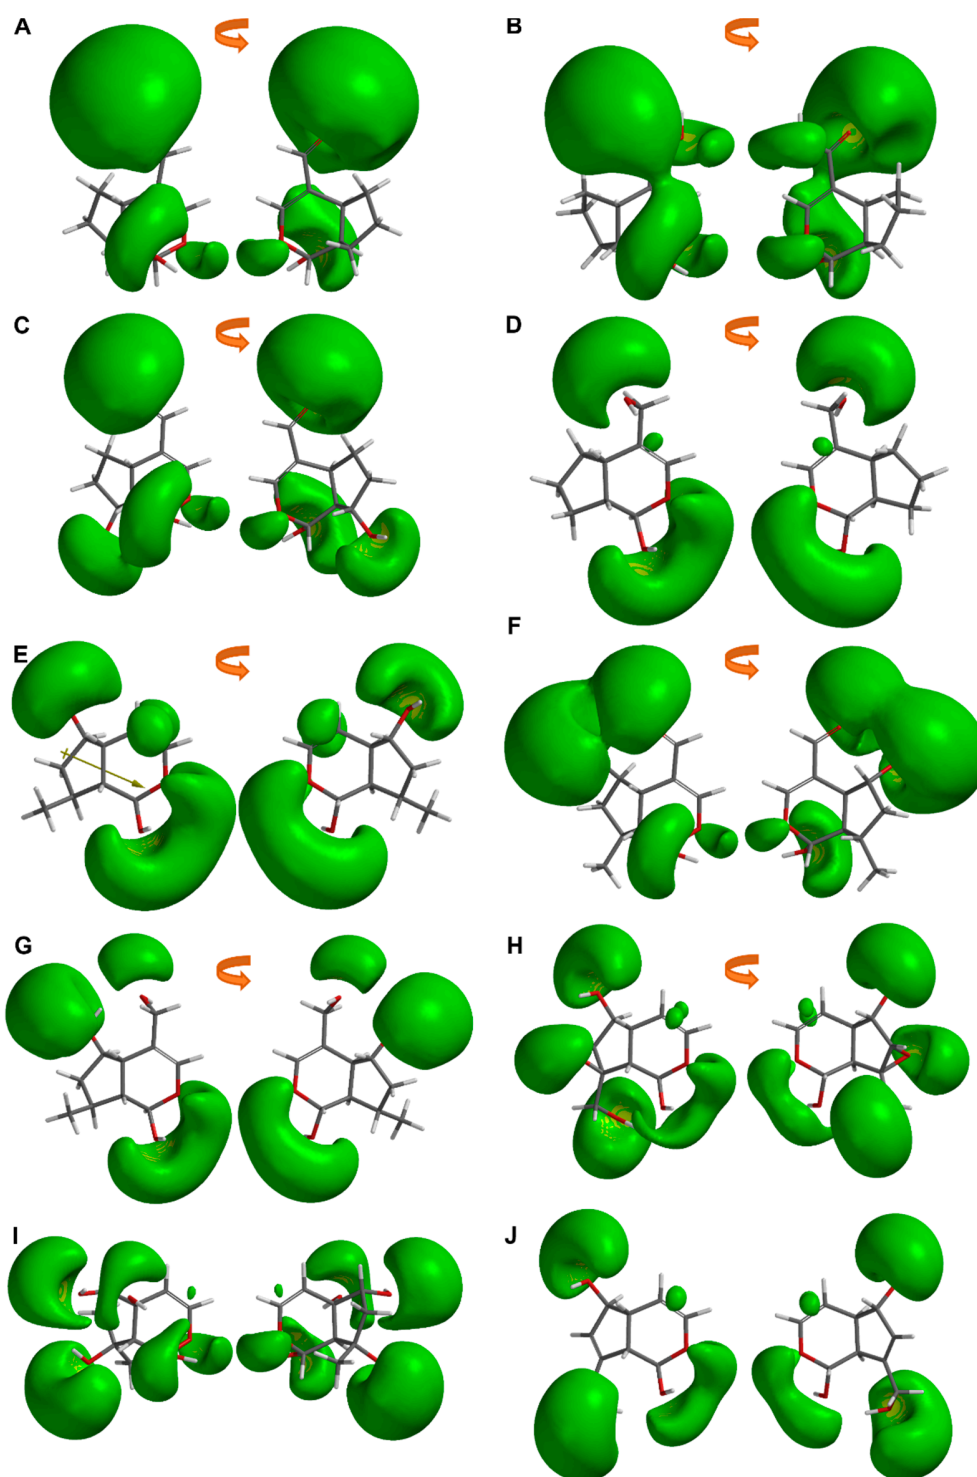

**Figure S8.** Molecular electrostatic potential iso-surface of -10 kcal/mol of the best designed iridoids. (A) D9, (B) D10, (C) D35, (D) D36, (E) D55, (F) D56, (G) D58, (H) D60, (I) D61, (J) D62.

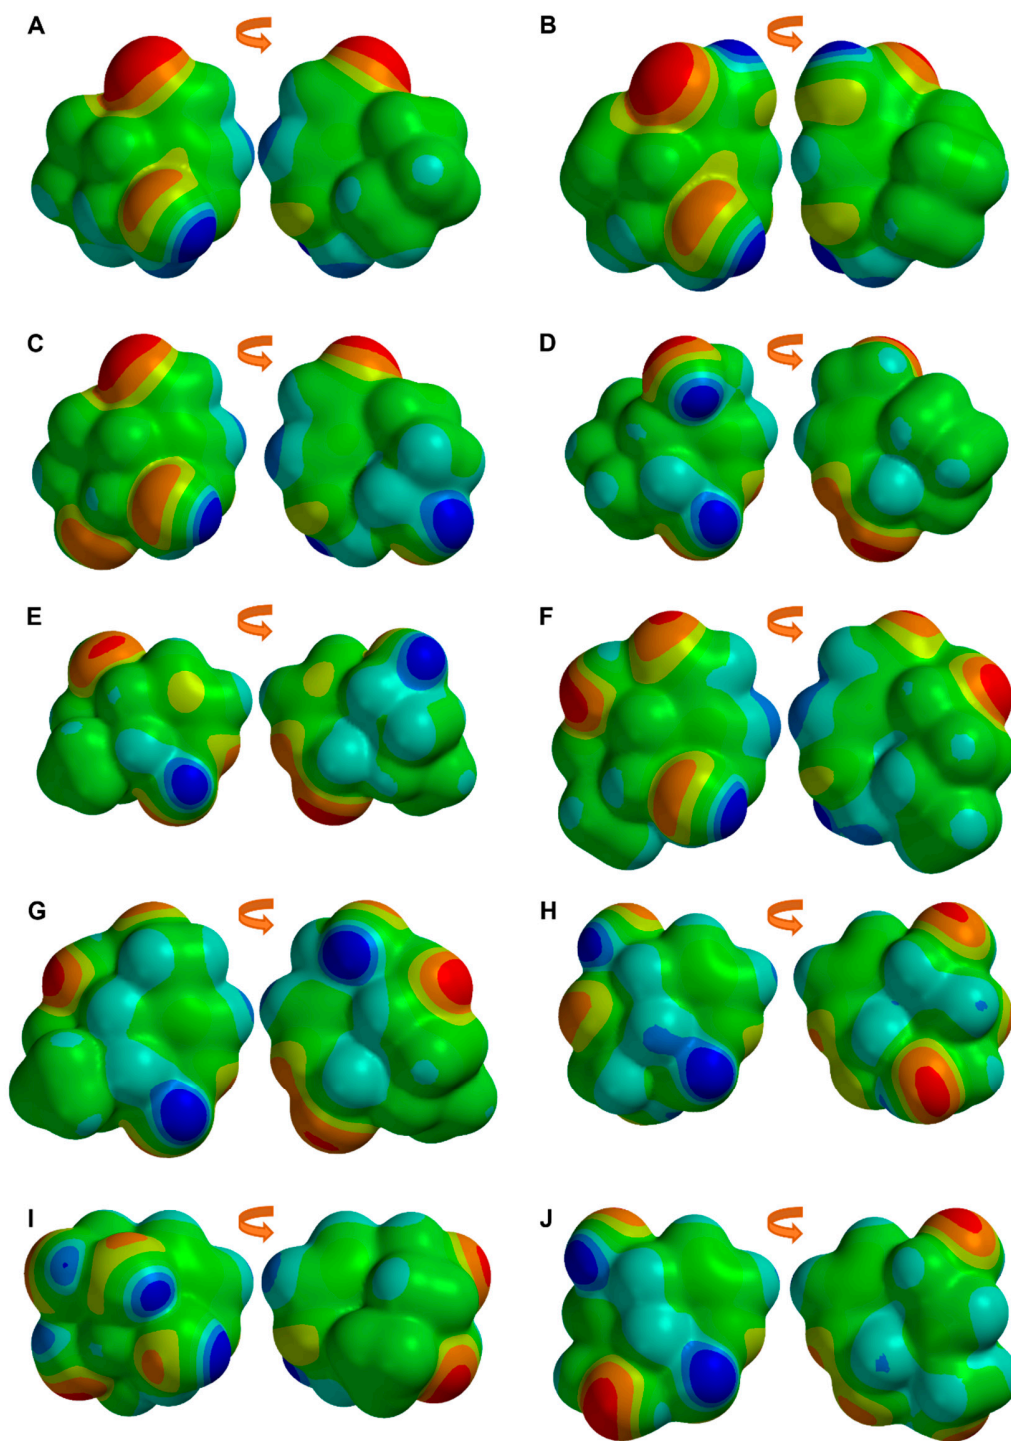

**Figure S9.** Molecular electrostatic potential map of the best designed iridoids. (A) D9, (B) D10, (C) D35, (D) D36, (E) D55, (F) D56, (G) D58, (H) D60, (I) D61, (J) D62.

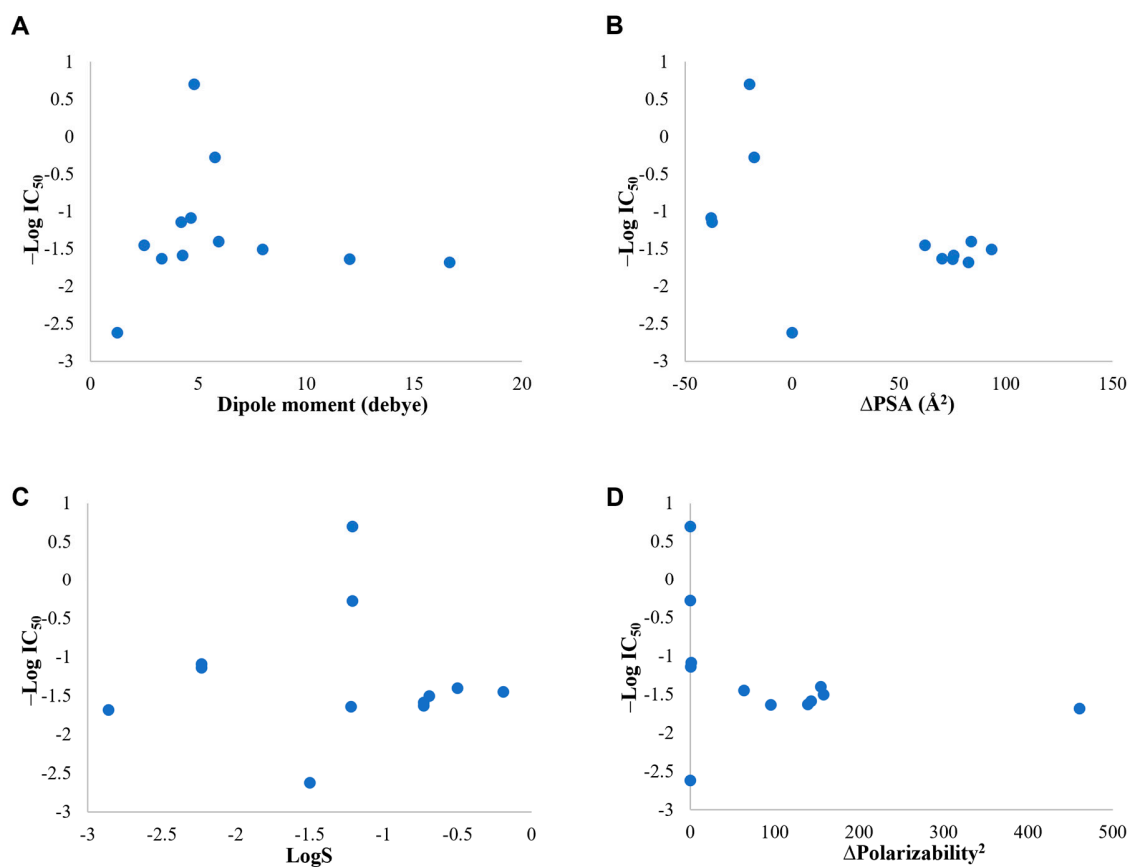

**Figure S10.** Independent correlations between the biological activity and the descriptors of the QSAR model. (A)  $-\text{Log IC}_{50}$  vs Dipole moment, (B)  $-\text{Log IC}_{50}$  vs  $\Delta\text{PSA}$ , (C)  $-\text{Log IC}_{50}$  vs LogS, (D)  $-\text{Log IC}_{50}$  vs  $\Delta\text{Polarizability}^2$ .

**Table S1.** Pearson correlation matrix.

| <i>Variables</i>                | Dipole moment | $\Delta\text{PSA}$ | LogS   | $\Delta\text{Polarizability}^2$ |
|---------------------------------|---------------|--------------------|--------|---------------------------------|
| Dipole moment                   | 1             | 0.1818             | 0.2138 | 0.5893                          |
| $\Delta\text{PSA}$              | 0.1818        | 1                  | 0.1994 | 0.4912                          |
| Log S                           | 0.2138        | 0.1994             | 1      | 0.0628                          |
| $\Delta\text{Polarizability}^2$ | 0.5893        | 0.4912             | 0.0628 | 1                               |

**Table S2.** pKa values of the acid iridoids.

| <i>Ligand</i>                               | <i>pKa</i> |
|---------------------------------------------|------------|
| <i>Geniposidic acid</i>                     | 4.22       |
| <i>10-O-(E)-p-coumaroylgeniposidic acid</i> | 4.16       |
| <i>D1</i>                                   | 4.51       |
| <i>D4</i>                                   | 4.56       |
| <i>D7</i>                                   | 4.56       |
| <i>D10</i>                                  | 4.62       |
| <i>D29</i>                                  | 4.72       |

**Table S3.** Molecular descriptors of designed iridoids. *Cont.*

| <b>Ligand</b> | <b>GAP<sub>HOMO-LUMO</sub> (kcal)</b> | <b>Dipole moment (debye)</b> | <b>Area (Å<sup>2</sup>)</b> | <b>Volume (Å<sup>3</sup>)</b> | <b>PSA (Å<sup>2</sup>)</b> | <b>Ovality</b> | <b>LogP</b> | <b>Polarizability</b> | <b>HBD Count</b> | <b>HBA Count</b> |
|---------------|---------------------------------------|------------------------------|-----------------------------|-------------------------------|----------------------------|----------------|-------------|-----------------------|------------------|------------------|
| D1*           | -125.85                               | 1.81                         | 217.56                      | 199.31                        | 78.714                     | 1.32           | -0.52       | 56.25                 | 3                | 4                |
| D2            | -120.73                               | 2.64                         | 208.92                      | 192.24                        | 59.084                     | 1.30           | -0.79       | 55.73                 | 2                | 4                |
| D3            | -127.72                               | 3.02                         | 244.68                      | 223.58                        | 65.992                     | 1.37           | 0.14        | 58.20                 | 2                | 4                |
| D4*           | -126.69                               | 3.41                         | 221.65                      | 203.47                        | 78.335                     | 1.32           | -0.12       | 56.58                 | 3                | 4                |
| D5            | -123.30                               | 5.40                         | 214.52                      | 196.18                        | 61.021                     | 1.31           | -0.38       | 56.02                 | 2                | 4                |
| D6            | -126.95                               | 3.29                         | 245.94                      | 224.18                        | 65.825                     | 1.38           | 0.14        | 58.26                 | 2                | 4                |
| D7*           | -126.50                               | 3.73                         | 223.82                      | 203.34                        | 80.250                     | 1.34           | -0.12       | 56.57                 | 3                | 4                |
| D8            | -122.27                               | 5.42                         | 215.72                      | 196.31                        | 61.345                     | 1.32           | -0.38       | 56.04                 | 2                | 4                |
| D9            | -123.61                               | 4.80                         | 187.58                      | 170.55                        | 42.052                     | 1.26           | 0.42        | 53.94                 | 1                | 3                |
| D10*          | -599.13                               | 12.32                        | 190.51                      | 175.42                        | 54.222                     | 1.26           | --          | 54.14                 | 1                | 4                |
| D11           | -127.89                               | 2.20                         | 219.28                      | 198.11                        | 47.446                     | 1.33           | 0.95        | 56.13                 | 1                | 3                |
| D12           | -122.45                               | 3.61                         | 206.94                      | 189.55                        | 42.020                     | 1.30           | -0.08       | 55.49                 | 1                | 3                |
| D13           | -123.80                               | 3.20                         | 210.58                      | 193.53                        | 41.979                     | 1.30           | 0.32        | 55.80                 | 1                | 3                |
| D14           | -122.68                               | 4.37                         | 211.90                      | 193.67                        | 41.090                     | 1.31           | 0.32        | 55.83                 | 1                | 3                |
| D15           | -122.56                               | 3.47                         | 218.12                      | 199.03                        | 41.939                     | 1.32           | 0.44        | 56.26                 | 1                | 3                |
| D16           | -123.82                               | 2.79                         | 221.00                      | 203.00                        | 41.821                     | 1.32           | 0.84        | 56.57                 | 1                | 3                |
| D17           | -122.67                               | 4.42                         | 222.08                      | 202.97                        | 40.996                     | 1.33           | 0.84        | 56.58                 | 1                | 3                |
| D18           | -122.73                               | 4.10                         | 216.01                      | 196.71                        | 62.142                     | 1.32           | -0.41       | 56.07                 | 2                | 4                |
| D19           | -123.30                               | 6.44                         | 219.60                      | 200.68                        | 60.798                     | 1.32           | -0.01       | 56.39                 | 2                | 4                |
| D20           | -123.12                               | 5.94                         | 220.74                      | 200.82                        | 61.263                     | 1.33           | -0.01       | 56.40                 | 2                | 4                |
| D21           | -127.06                               | 2.47                         | 222.59                      | 202.35                        | 84.953                     | 1.34           | -1.17       | 56.48                 | 3                | 5                |
| D22           | -127.83                               | 3.60                         | 226.70                      | 206.31                        | 83.982                     | 1.34           | -0.77       | 56.80                 | 3                | 5                |
| D23           | -129.51                               | 5.38                         | 227.87                      | 206.45                        | 84.829                     | 1.35           | -0.77       | 56.79                 | 3                | 5                |
| D24           | -120.42                               | 2.63                         | 229.19                      | 210.22                        | 61.867                     | 1.34           | -0.01       | 57.19                 | 2                | 4                |

\*These iridoids were analyzed in their anion form. --: Not determined with Spartan'20.

**Table S3.** Molecular descriptors of designed iridoids. *Cont.*

| Ligand | GAP <sub>HOMO-LUMO</sub> (kcal) | Dipole moment (debye) | Area (Å <sup>2</sup> ) | Volume (Å <sup>3</sup> ) | PSA (Å <sup>2</sup> ) | Ovality | LogP  | Polarizability | HBD Count | HBA Count |
|--------|---------------------------------|-----------------------|------------------------|--------------------------|-----------------------|---------|-------|----------------|-----------|-----------|
| D25    | -120.85                         | 4.28                  | 232.76                 | 214.18                   | 60.492                | 1.34    | 0.39  | 57.51          | 2         | 4         |
| D26    | -120.23                         | 4.83                  | 233.82                 | 214.32                   | 60.926                | 1.35    | 0.39  | 57.33          | 2         | 4         |
| D27    | -139.77                         | 0.59                  | 215.39                 | 194.54                   | 47.457                | 1.33    | 0.88  | 55.72          | 2         | 3         |
| D28    | -123.43                         | 4.80                  | 206.65                 | 188.8                    | 42.041                | 1.30    | 0.75  | 55.42          | 1         | 3         |
| D29*   | -89.18                          | 11.93                 | 211.04                 | 193.89                   | 55.479                | 1.30    | --    | 56.19          | 1         | 4         |
| D30    | -126.98                         | 2.29                  | 237.49                 | 216.71                   | 46.402                | 1.36    | 1.28  | 57.65          | 1         | 3         |
| D31    | -128.21                         | 3.95                  | 219.07                 | 198.98                   | 65.082                | 1.33    | 0.36  | 56.20          | 2         | 4         |
| D32    | -128.28                         | 4.00                  | 199.75                 | 180.67                   | 64.951                | 1.29    | 0.03  | 54.71          | 2         | 4         |
| D33    | -121.04                         | 4.05                  | 224.89                 | 206.79                   | 41.505                | 1.33    | 1.52  | 56.91          | 1         | 3         |
| D34    | -121.19                         | 4.05                  | 205.95                 | 188.56                   | 41.547                | 1.30    | 1.19  | 55.43          | 1         | 3         |
| D35    | -123.99                         | 3.36                  | 197.34                 | 178.62                   | 60.872                | 1.29    | -0.67 | 54.59          | 2         | 4         |
| D36    | -138.78                         | 0.69                  | 196.25                 | 176.32                   | 47.478                | 1.29    | 0.55  | 54.25          | 2         | 3         |
| D37    | -118.35                         | 2.24                  | 213.18                 | 194.21                   | 41.271                | 1.31    | 1.20  | 55.91          | 1         | 3         |
| D38    | -505.46                         | 2.89                  | 258.12                 | 237.65                   | 40.393                | 1.39    | 2.09  | 59.41          | 1         | 3         |
| D39    | -121.33                         | 2.90                  | 227.28                 | 207.57                   | 40.391                | 1.34    | 1.84  | 56.97          | 1         | 3         |
| D40    | -122.19                         | 3.23                  | 244.69                 | 225.37                   | 40.061                | 1.37    | 2.17  | 58.40          | 1         | 3         |
| D41    | -120.24                         | 3.53                  | 233.02                 | 212.41                   | 40.307                | 1.35    | 1.49  | 57.37          | 1         | 3         |
| D42    | -120.89                         | 3.85                  | 250.54                 | 230.24                   | 39.951                | 1.38    | 1.82  | 58.81          | 1         | 3         |
| D43    | -119.35                         | 4.24                  | 238.48                 | 217.09                   | 40.325                | 1.37    | 1.62  | 57.76          | 1         | 3         |
| D44    | -120.14                         | 4.76                  | 256.53                 | 235.02                   | 40.276                | 1.39    | 1.95  | 59.21          | 1         | 3         |
| D45    | -118.8                          | 5.60                  | 243.29                 | 220.98                   | 41.009                | 1.38    | 2.28  | 58.08          | 1         | 3         |
| D46    | -118.78                         | 6.57                  | 261.08                 | 239.07                   | 40.651                | 1.40    | 2.61  | 59.55          | 1         | 3         |
| D47    | -121.41                         | 2.78                  | 247.40                 | 225.98                   | 40.377                | 1.38    | 2.26  | 58.46          | 1         | 3         |
| D48    | -122.26                         | 3.13                  | 264.90                 | 243.79                   | 40.089                | 1.40    | 2.59  | 59.90          | 1         | 3         |
| D49    | -120.70                         | 3.00                  | 236.69                 | 218.98                   | 41.081                | 1.35    | 1.91  | 57.90          | 1         | 3         |
| D50    | -121.47                         | 3.38                  | 254.60                 | 236.87                   | 40.669                | 1.38    | 2.24  | 59.34          | 1         | 3         |
| D51    | -121.22                         | 2.81                  | 250.72                 | 234.64                   | 40.355                | 1.36    | 2.33  | 59.16          | 1         | 3         |
| D52    | -122.30                         | 3.16                  | 268.57                 | 252.58                   | 40.051                | 1.39    | 2.66  | 60.61          | 1         | 3         |
| D53    | -122.14                         | 2.92                  | 265.73                 | 250.8                    | 39.881                | 1.38    | 2.75  | 60.47          | 1         | 3         |
| D54    | -123.62                         | 3.15                  | 284.17                 | 268.82                   | 40.524                | 1.41    | 3.08  | 61.91          | 1         | 3         |
| D55    | -139.52                         | 1.70                  | 196.35                 | 176.40                   | 47.351                | 1.29    | 0.61  | 54.25          | 2         | 3         |
| D56    | -118.90                         | 4.81                  | 213.74                 | 196.37                   | 57.202                | 1.31    | -0.41 | 56.08          | 2         | 4         |
| D57    | -119.30                         | 4.54                  | 221.22                 | 203.82                   | 76.266                | 1.32    | -1.54 | 56.68          | 3         | 5         |
| D58    | -140.01                         | 1.99                  | 219.39                 | 201.10                   | 61.709                | 1.32    | -0.28 | 56.25          | 3         | 4         |
| D59    | -137.43                         | 2.62                  | 226.10                 | 208.66                   | 80.151                | 1.33    | -1.41 | 56.89          | 4         | 5         |
| D60    | -144.58                         | 2.30                  | 201.54                 | 184.95                   | 73.770                | 1.28    | -1.50 | 54.89          | 3         | 5         |
| D61    | -145.63                         | 3.19                  | 207.72                 | 190.41                   | 80.817                | 1.30    | -1.25 | 55.33          | 4         | 5         |
| D62    | -135.25                         | 0.86                  | 196.11                 | 178.97                   | 61.665                | 1.28    | -0.79 | 54.50          | 3         | 4         |

\*These iridoids were analyzed in their anion form. --: Not determined with Spartan'20.

**Table S3.** Molecular descriptors of designed iridoids. *Cont.*

| Ligand | GAP <sub>HOMO-LUMO</sub> (kcal) | Dipole moment (debye) | Area (Å <sup>2</sup> ) | Volume (Å <sup>3</sup> ) | PSA (Å <sup>2</sup> ) | Ovality | LogP | Polarizability | HBD Count | HBA Count |
|--------|---------------------------------|-----------------------|------------------------|--------------------------|-----------------------|---------|------|----------------|-----------|-----------|
| D63    | -505.46                         | 2.89                  | 258.12                 | 237.65                   | 40.393                | 1.39    | 2.09 | 59.41          | 1         | 3         |
| D64    | -121.91                         | 3.11                  | 276.76                 | 255.71                   | 40.739                | 1.42    | 2.42 | 60.87          | 1         | 3         |
| D65    | -121.14                         | 2.80                  | 273.51                 | 253.54                   | 40.435                | 1.41    | 2.51 | 60.70          | 1         | 3         |
| D66    | -122.09                         | 2.95                  | 292.14                 | 271.56                   | 40.779                | 1.44    | 2.84 | 62.15          | 1         | 3         |
| D67    | -121.09                         | 2.70                  | 288.39                 | 269.65                   | 40.352                | 1.43    | 2.93 | 62.01          | 1         | 3         |
| D68    | -122.08                         | 3.01                  | 305.93                 | 287.51                   | 40.105                | 1.45    | 3.26 | 63.44          | 1         | 3         |
| D69    | -130.53                         | 3.51                  | 269.44                 | 248.10                   | 50.269                | 1.41    | 0.98 | 60.16          | 2         | 4         |
| D70    | -130.04                         | 3.66                  | 288.14                 | 266.22                   | 49.777                | 1.44    | 1.31 | 61.64          | 2         | 4         |
| D71    | -137.74                         | 2.13                  | 225.54                 | 202.41                   | 52.922                | 1.35    | 0.27 | 56.38          | 2         | 4         |
| D72    | -133.99                         | 4.17                  | 241.33                 | 219.48                   | 51.970                | 1.37    | 0.60 | 57.80          | 2         | 4         |
| D73    | -140.90                         | 4.11                  | 230.88                 | 207.20                   | 52.801                | 1.36    | 0.48 | 56.74          | 2         | 4         |
| D74    | -137.00                         | 4.34                  | 249.84                 | 225.37                   | 52.539                | 1.40    | 0.81 | 58.25          | 2         | 4         |
| D75    | -129.17                         | 4.96                  | 233.03                 | 210.51                   | 51.527                | 1.36    | 0.98 | 57.13          | 2         | 4         |
| D76    | -135.26                         | 4.02                  | 255.21                 | 229.88                   | 52.563                | 1.41    | 1.31 | 58.63          | 2         | 4         |
| D77    | -136.40                         | 5.49                  | 239.97                 | 215.68                   | 51.589                | 1.38    | --   | 57.47          | 2         | 4         |
| D78    | -533.02                         | 6.25                  | 257.40                 | 233.22                   | 51.275                | 1.40    | --   | 58.99          | 2         | 4         |
| D79    | -137.70                         | 2.26                  | 246.55                 | 221.08                   | 52.731                | 1.39    | 0.61 | 57.90          | 2         | 4         |
| D80    | -140.36                         | 3.98                  | 246.76                 | 239.11                   | 52.530                | 1.42    | 0.94 | 59.33          | 2         | 4         |
| D81    | -129.02                         | 3.56                  | 253.51                 | 232.11                   | 50.210                | 1.39    | 0.56 | 58.88          | 2         | 4         |
| D82    | -540.05                         | 3.67                  | 272.36                 | 250.18                   | 50.028                | 1.42    | 0.89 | 60.35          | 2         | 4         |
| D83    | -130.53                         | 3.51                  | 269.44                 | 248.10                   | 50.269                | 1.41    | 0.98 | 60.16          | 2         | 4         |
| D84    | -130.04                         | 3.66                  | 288.14                 | 266.22                   | 49.777                | 1.44    | 1.31 | 61.64          | 2         | 4         |
| D85    | -138.22                         | 4.33                  | 286.35                 | 264.62                   | 51.888                | 1.44    | 1.40 | 61.42          | 2         | 4         |
| D86    | -138.33                         | 4.29                  | 305.36                 | 282.82                   | 51.735                | 1.47    | 1.73 | 62.90          | 2         | 4         |

\*These iridoids were analyzed in their anion form. --: Not determined with Spartan'20.
